# Supplementary figures and images for: FNIP1 regulates adipocyte browning and systemic glucose homeostasis in mice by shaping intracellular calcium dynamics
Source: PubMed Central journal article supplement — J Exp Med. 2022 Apr 12;219(5):e20212491. doi: 10.1084/jem.20212491 (PMC9008465; doi:10.1084/jem.20212491), 2022-04-12

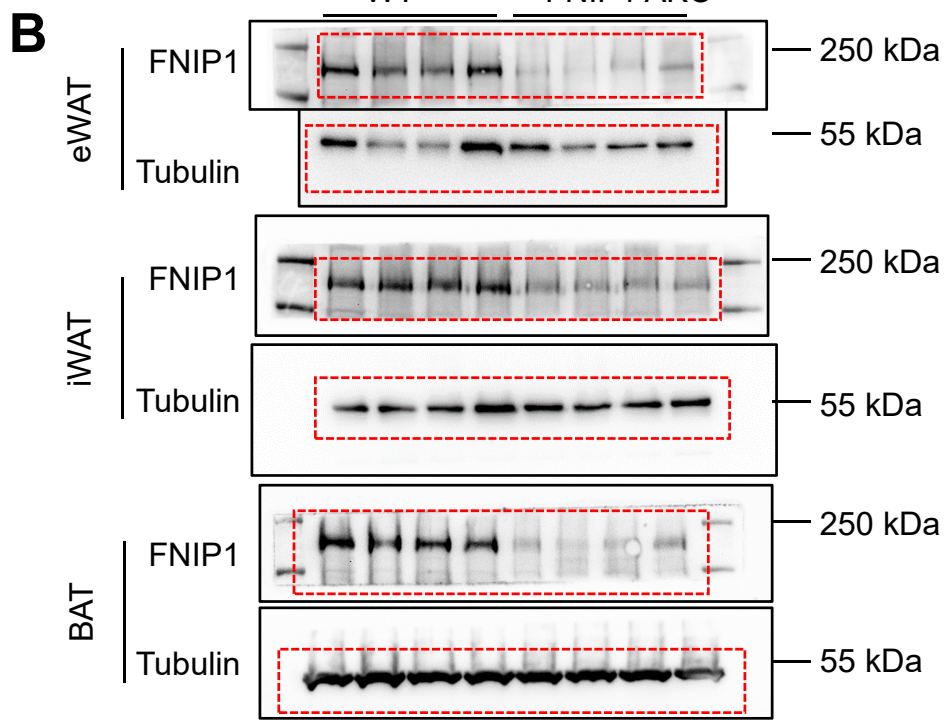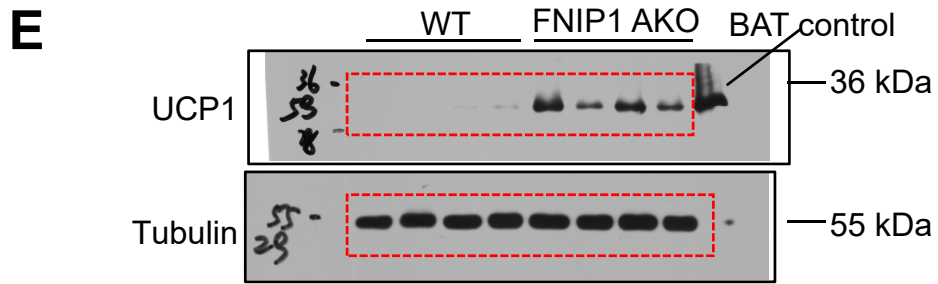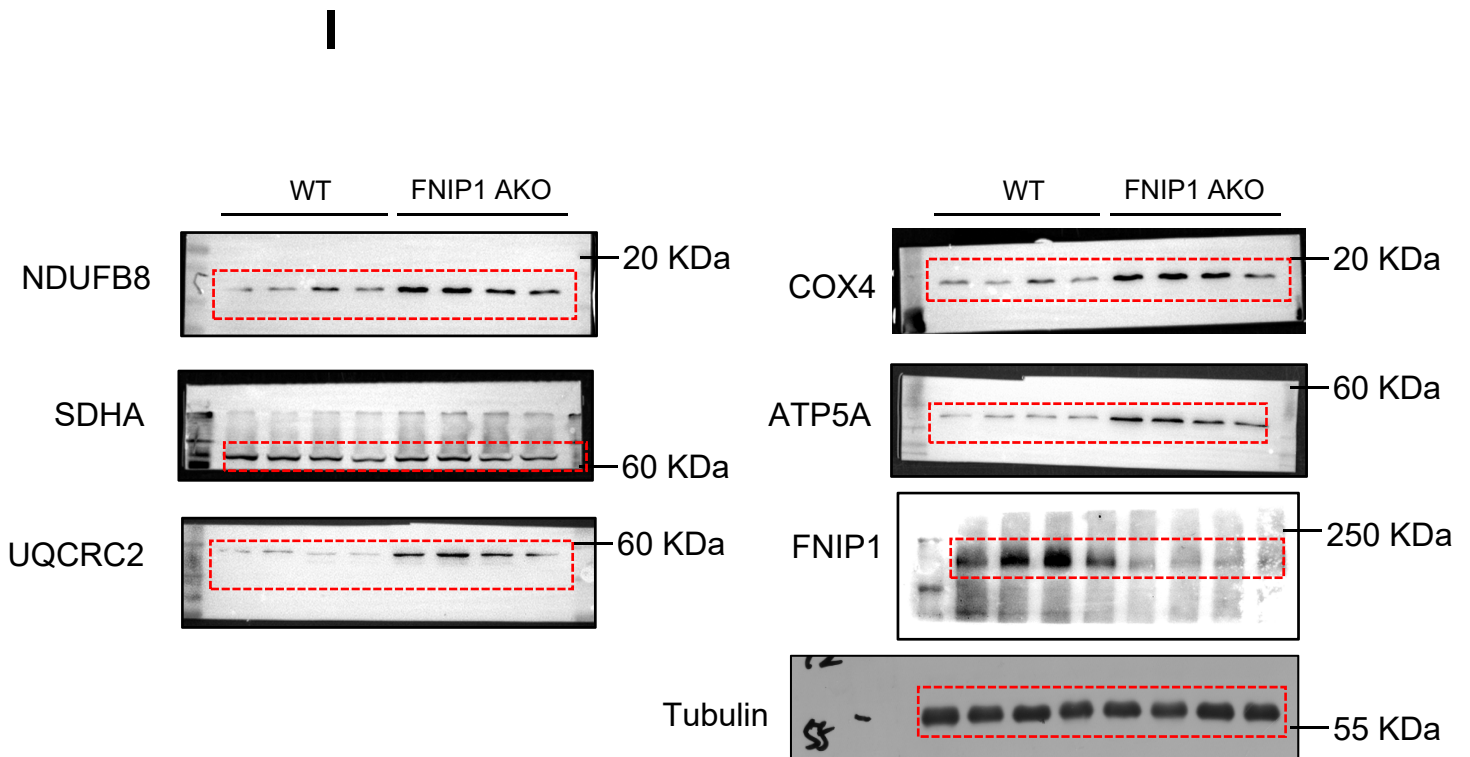

Supplement: JEM_20212491_SourceDataF1.pdf [file JEM_20212491_SourceDataF1.pdf]

**A**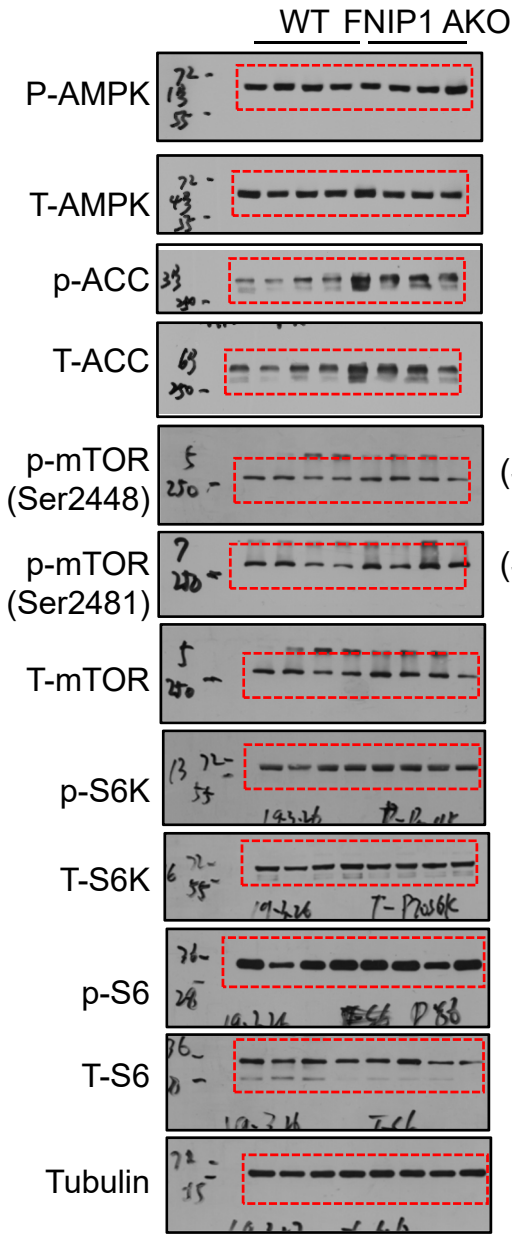**C**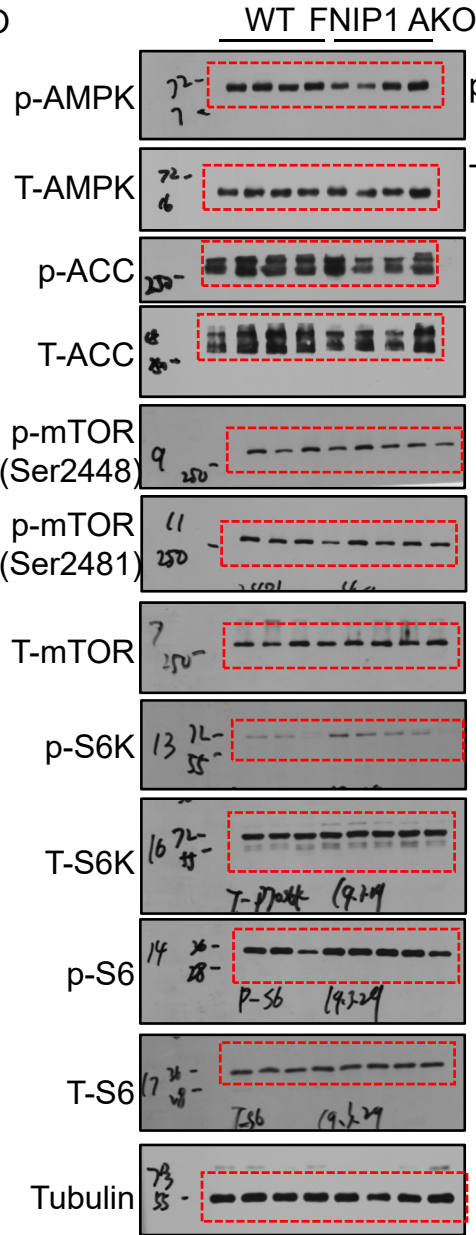**G**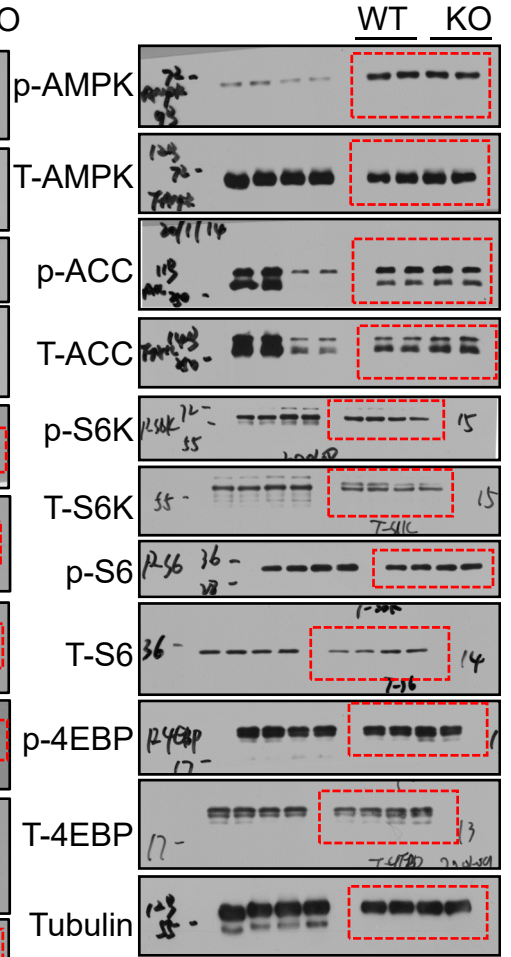**I**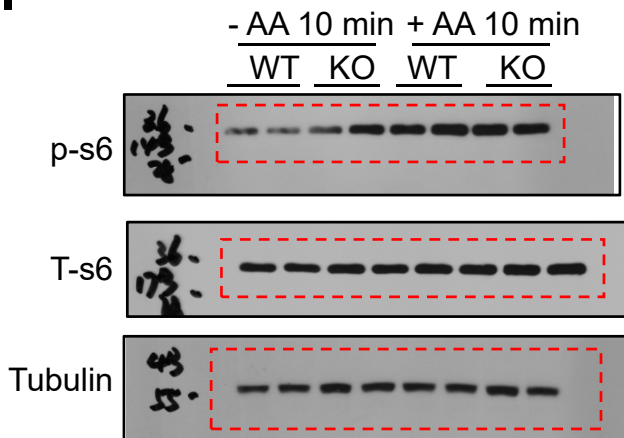

Supplement: JEM_20212491_SourceDataF3.pdf [file JEM_20212491_SourceDataF3.pdf]

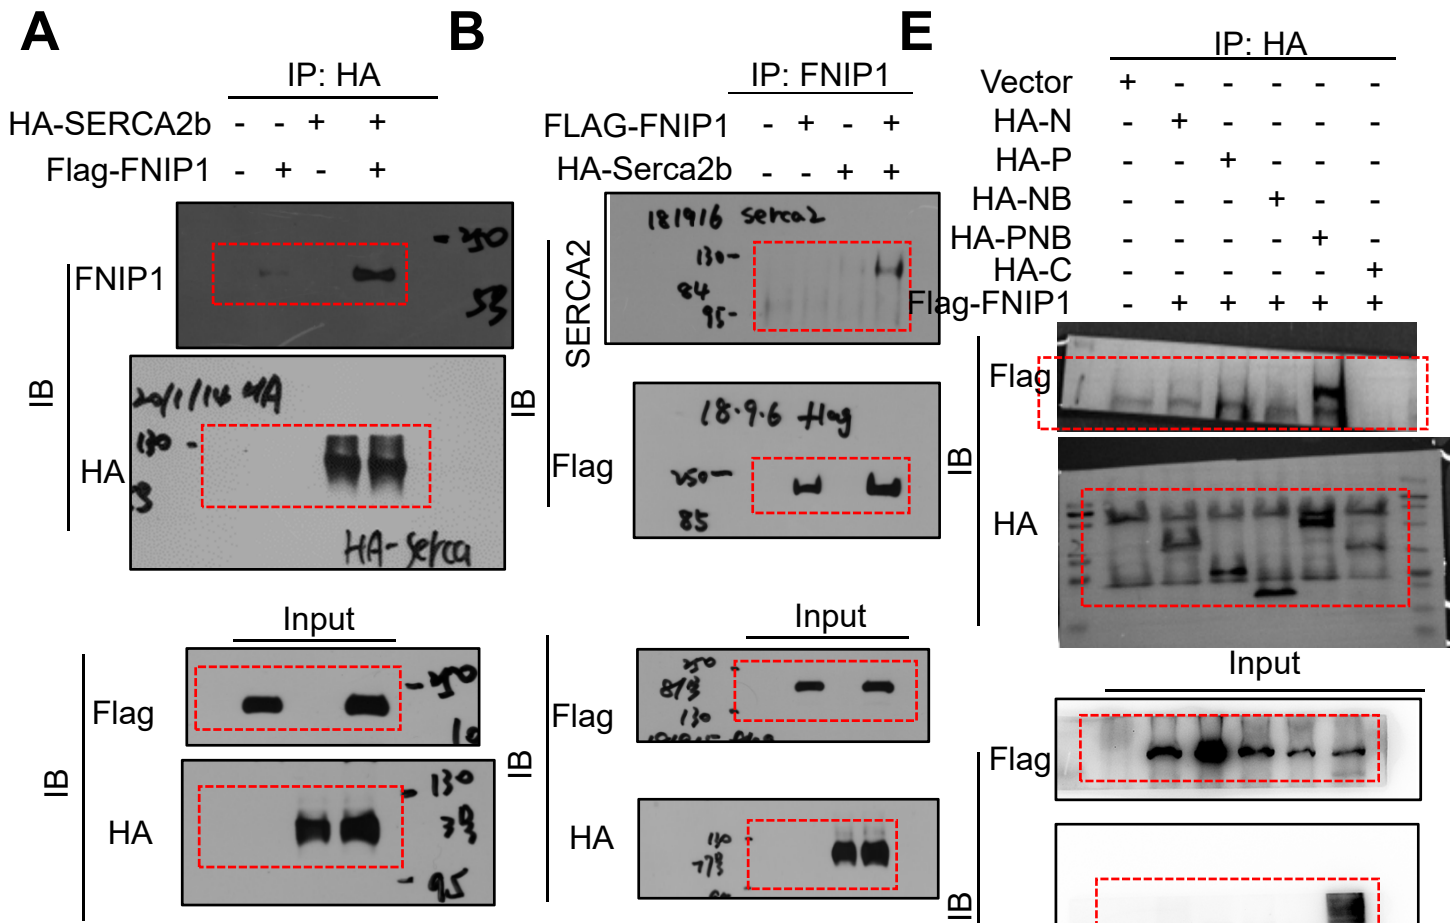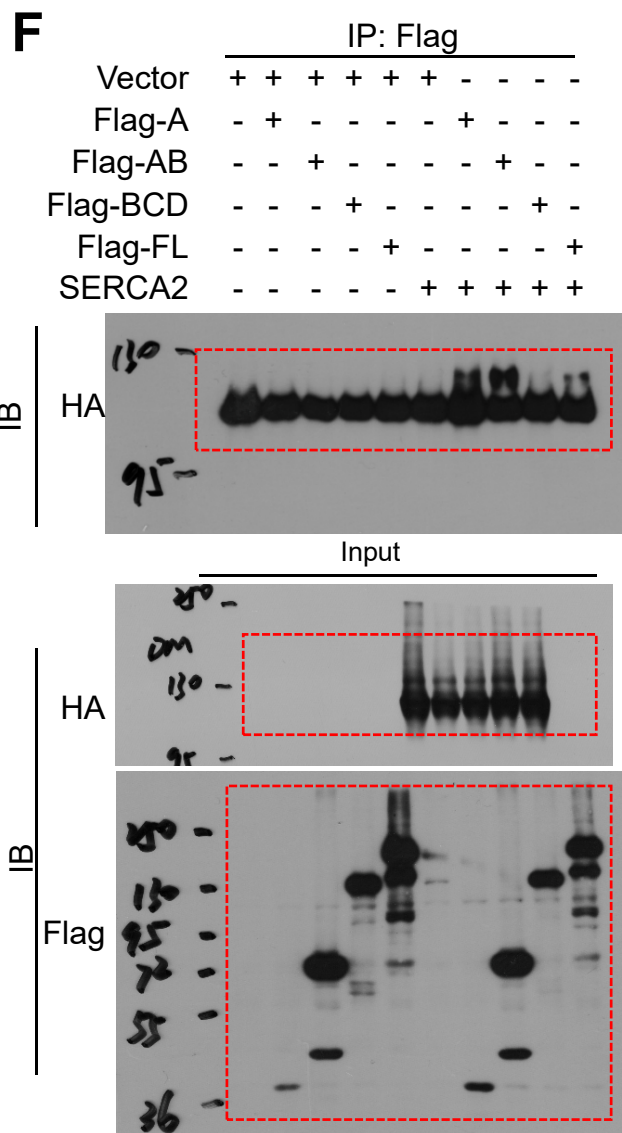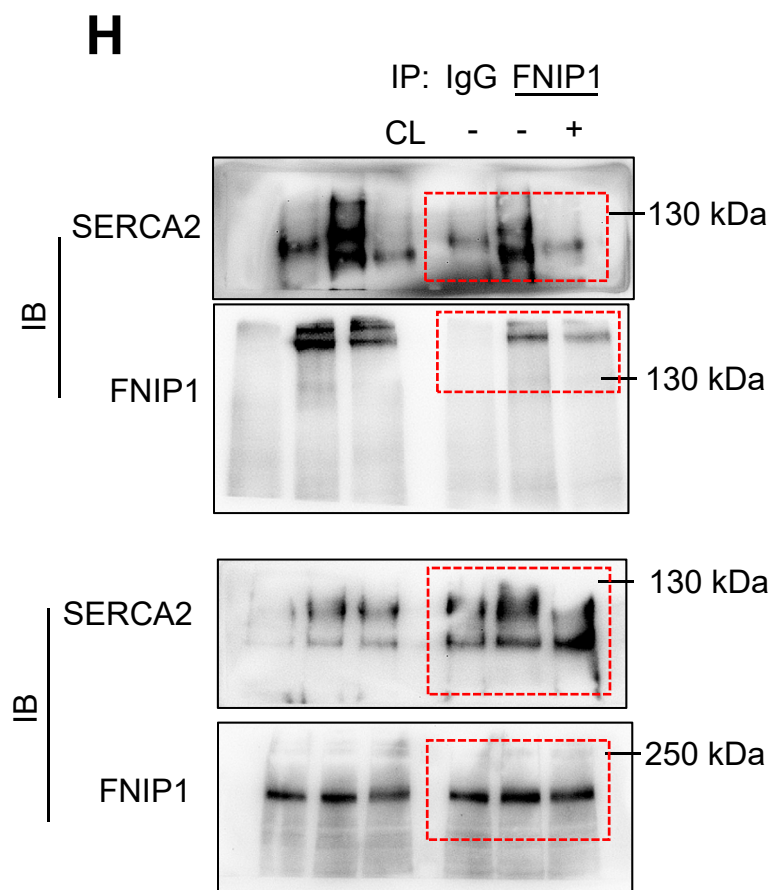

Supplement: JEM_20212491_SourceDataF5.pdf [file JEM_20212491_SourceDataF5.pdf]

**A**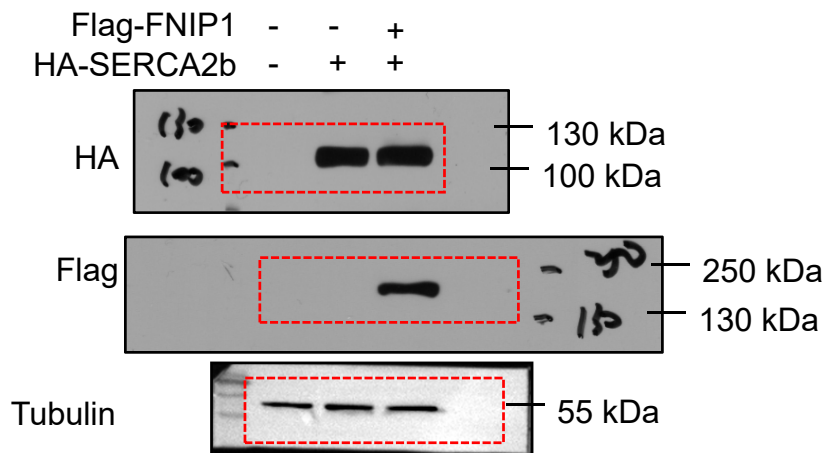**F**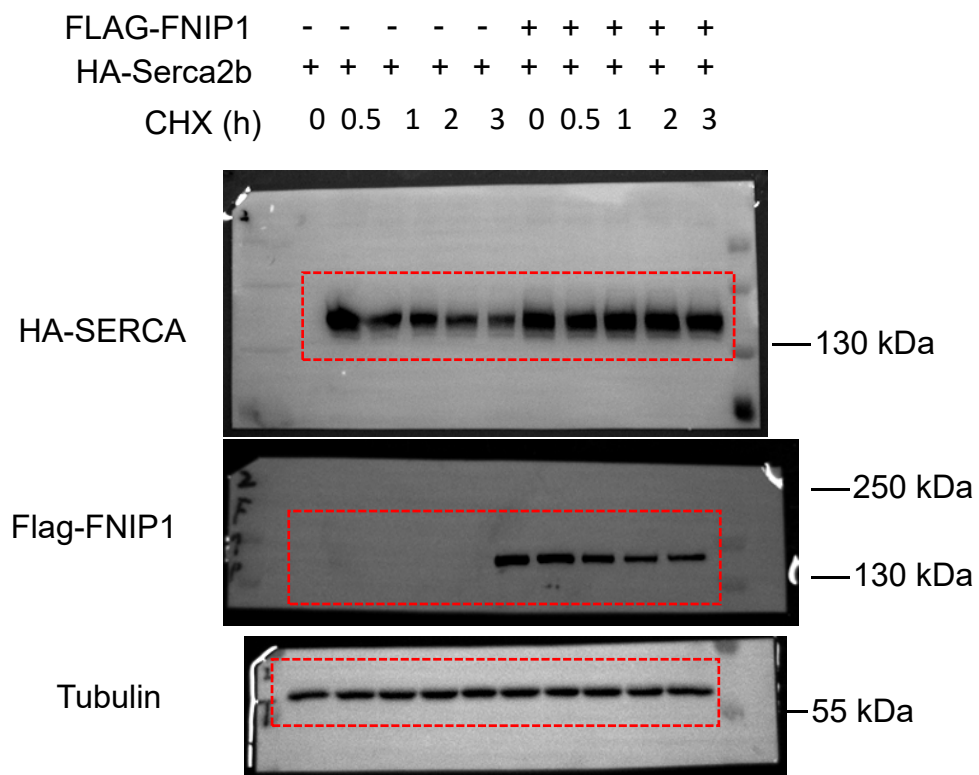**G**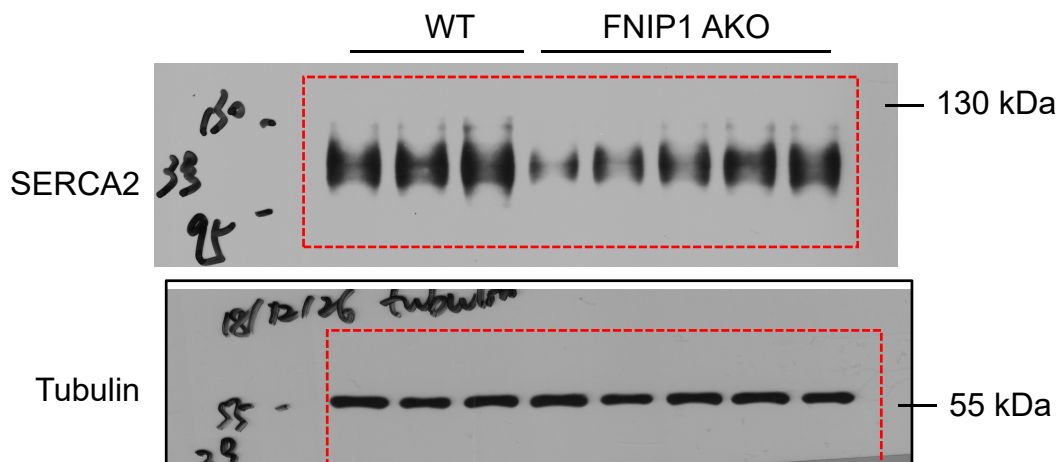

Supplement: JEM_20212491_SourceDataF6.pdf [file JEM_20212491_SourceDataF6.pdf]

**B**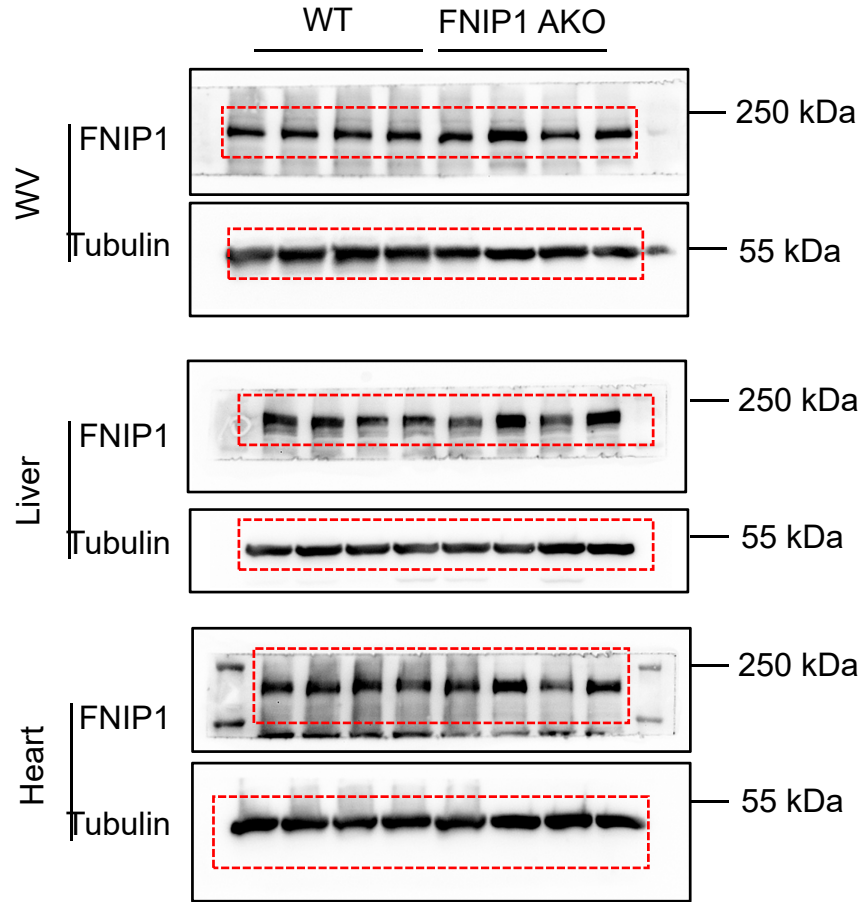**E**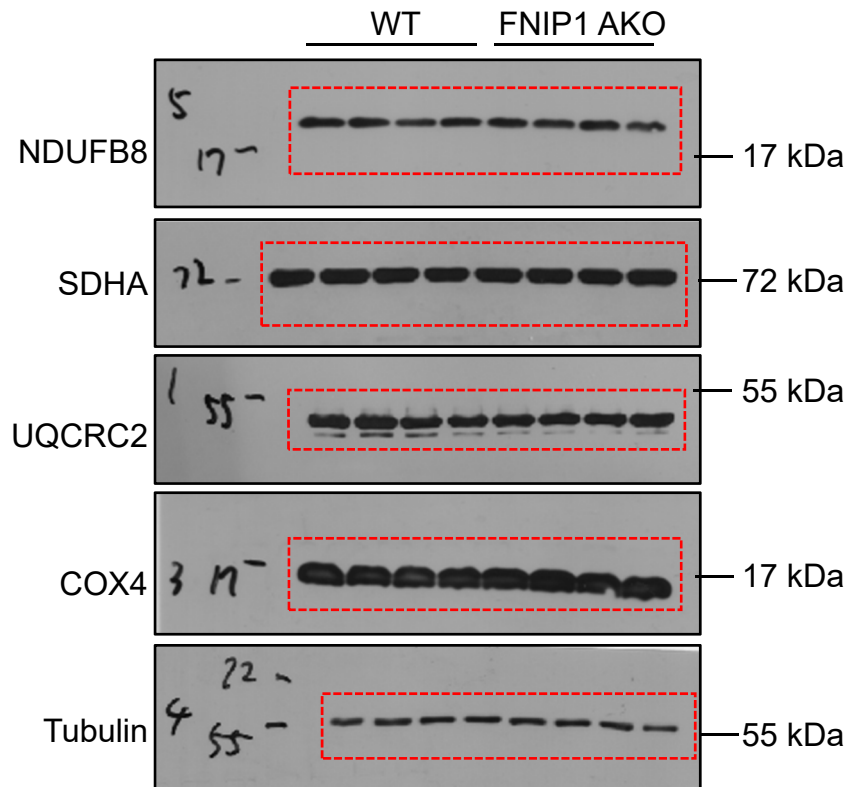

Supplement: JEM_20212491_SourceDataFS1.pdf [file JEM_20212491_SourceDataFS1.pdf]
